# Supplementary material for: Reactivity of lithium n-butyl amidinates towards group 14 metal(ii) chlorides providing series of hetero- and homoleptic tetrylenes
Source: Royal Society of Chemistry journal article supplement (doi:10.1039/c2dt12472f), 2012-01-01
Supplement: c2dt12472f.pdf [file c2dt12472f.pdf]

## Reactivity of Lithium *n*-Butyl Amidinates Towards Group 14 Metal(II) Chlorides Providing Series of Hetero- and Homoleptic Tetrylenes.

Tomáš Chlupatý,<sup>[a]</sup> Zdeňka Padělková,<sup>[a]</sup> Antonín Lyčka,<sup>[b]</sup> Jiří Brus,<sup>[c]</sup> Aleš Růžička,<sup>\*,[a]</sup>

<sup>[a]</sup> Department of General and Inorganic Chemistry, Faculty of Chemical Technology,  
University of Pardubice, Studentská 573, CZ-532 10, Pardubice, Czech Republic, Fax: +420-  
466037068, \*E-mail: ales.ruzicka@upce.cz

<sup>[b]</sup> Research Institute for Organic Syntheses (VUOS), Rybitví 296, CZ-533 54 Pardubice,  
Czech Republic

<sup>[c]</sup> Institute of Macromolecular Chemistry, Academy of Science of the Czech Republic,  
Heyrovský Sqr. 2, 162 06, Praha 6, Czech Republic

### Table of Contents

|                                                             |         |
|-------------------------------------------------------------|---------|
| NMR spectrum – Figures S1.....                              | page S2 |
| Detail of coordination sphere of <b>5a</b> - Figure S2..... | page S3 |
| Molecular structure of $L^{Cy}HfC_6H_6$ - Figure S3.....    | page S3 |
| Reference.....                                              | page S4 |

Supporting materials

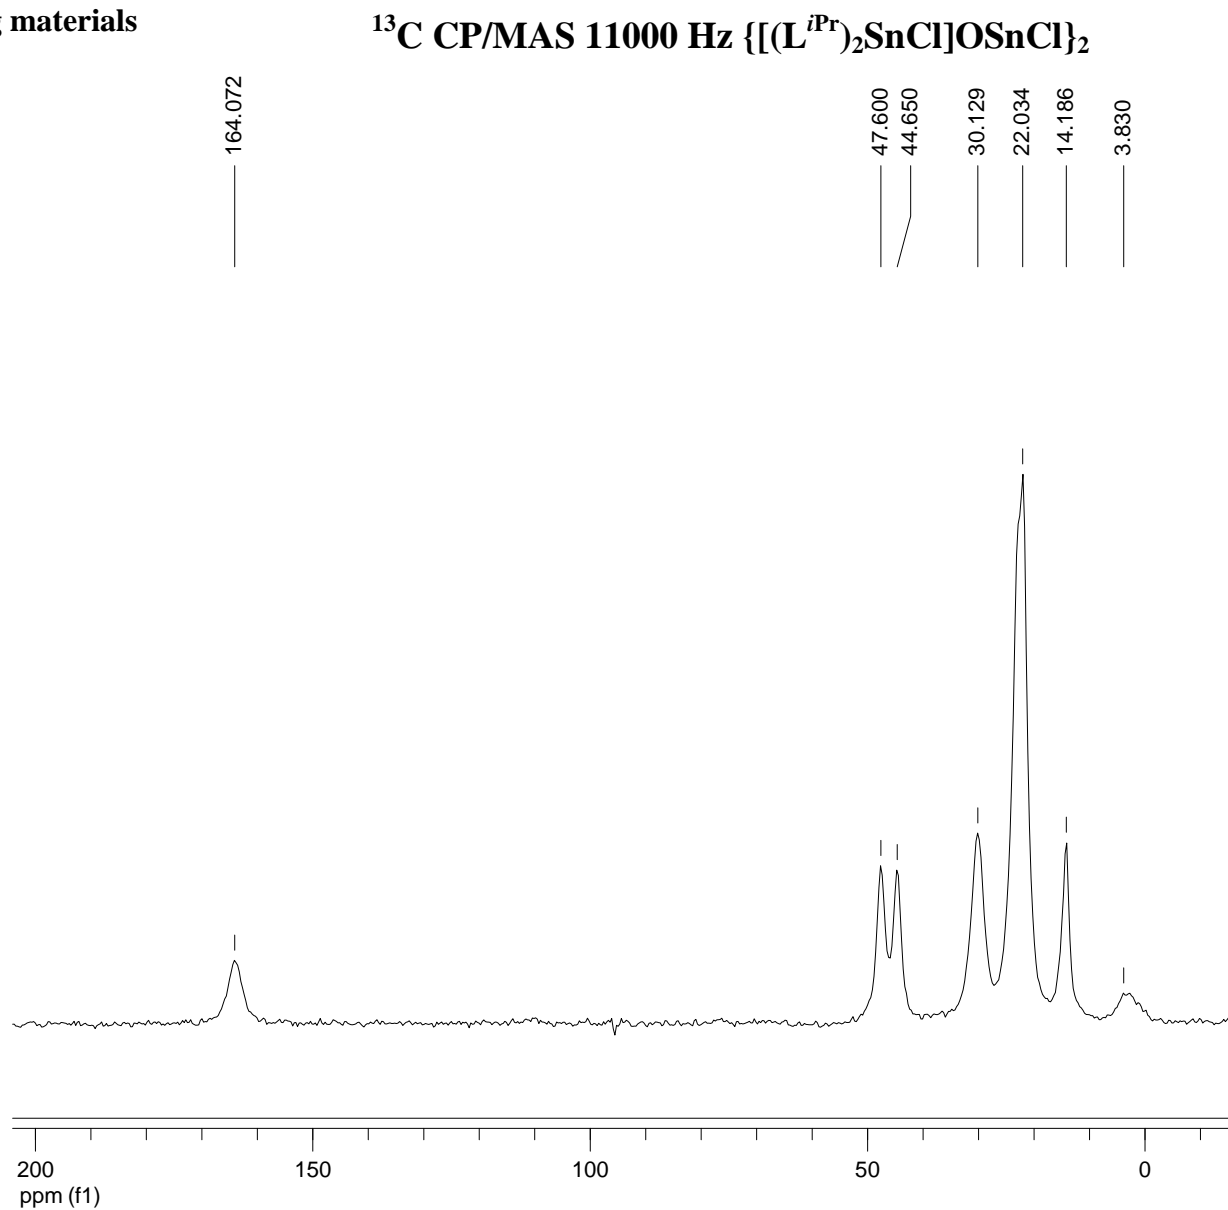

**Date:**  
21 Nov 2011

**Document's Title:**  
fid

**Spectrum Title:**  
11kHz, RT, NS=7k, D1=4s.

**Frequency (MHz):**  
(f1) 125.783

**Original Points Count:**  
(f1) 512

**Actual Points Count:**  
(f1) 1024

**Acquisition Time (sec):**  
(f1) 0.0136

**Spectral Width (ppm):**  
(f1) 298.880

**Pulse Program:**  
CP.AV

**Temperature:**  
295.9

**Number of Scans:**  
7494

**Acq. Date:**  
Thu Feb 03 02:57:06 PM

**Fig. S1:**  $^{13}\text{C}$  CP/MAS NMR spectrum of **5a**

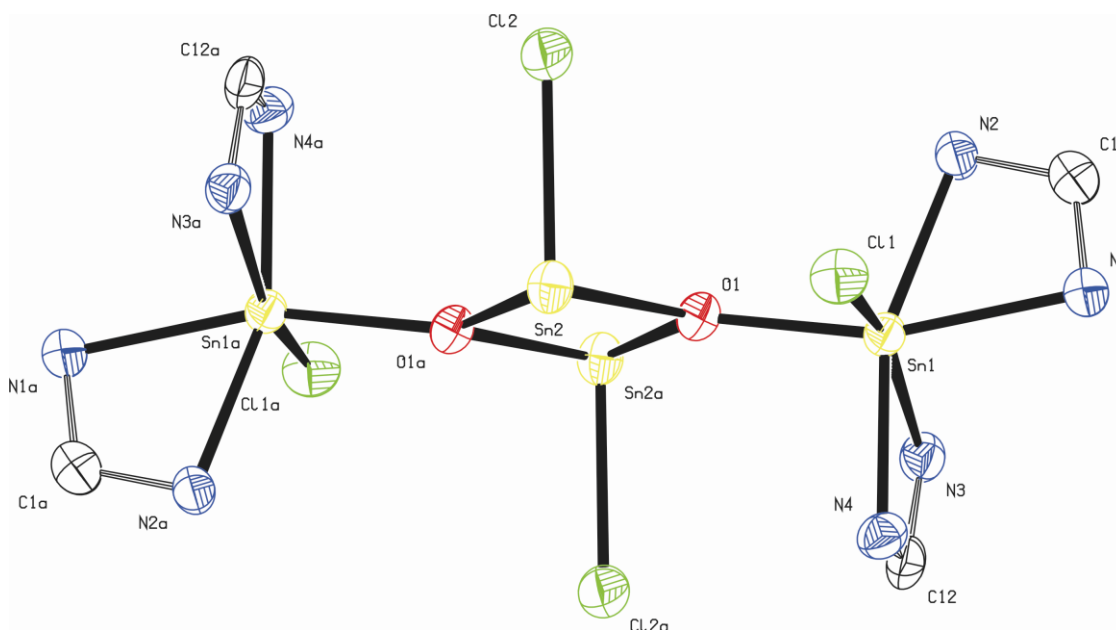

**Fig. S2:** Detail of the coordination sphere of tin atoms in molecular structure of **5a**

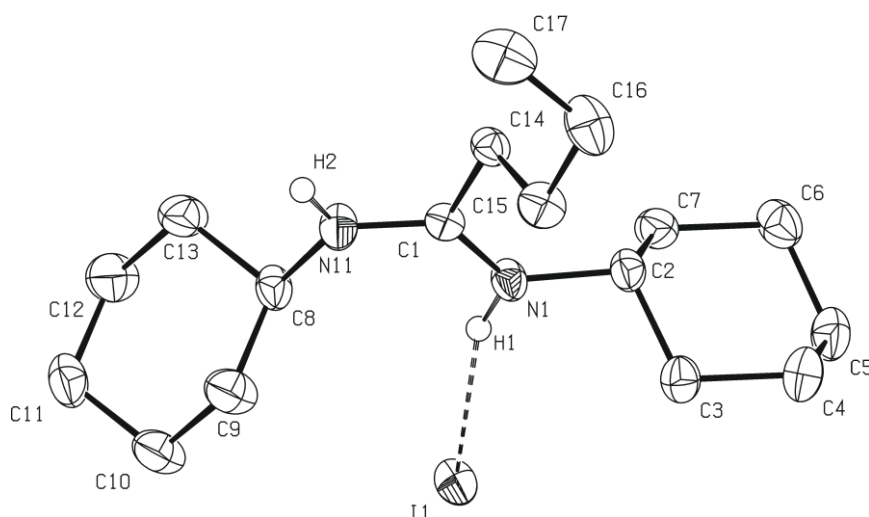

**Fig. S3:** Molecular structure of  $L^{Cy}HI \cdot C_6H_6$  (ORTEP view, 50% probability level). Hydrogen atoms are omitted for clarity. Selected interatomic distances [Å] and angles [°]: N1-C1 1.317(3); N1-C2 1.474(3); N11-C1 1.316(3); N11-C8 1.473(3); C1-C14 1.509(4); N1-I1 3.723(2); N1-C1-N11 121.9(2); C2-C1-C8 121.90(13).

In the  $L^{Cy}HI \cdot C_6H_6$ , there is no acyclic protonated amidine structure reported up to now except of N-[(3-methoxyphenyl)(methylamino)methylene]methanaminium<sup>1</sup> chloride monohydrate which is difficult to compare with  $L^{Cy}HI$  because of extensive hydrogen bonding with the water molecule(s). On the other hand, in  $L^{Cy}HI$  there are only NH...I contacts forming nonlinear infinite

chain in the solid state. The central NC(*n*-Bu)N moiety is nearly planar due to high degree of delocalization of  $\pi$ -electrons within this fragment (Fig. S3). The differences in the bond lengths and angles between **L<sup>Cy</sup>HI** and previously reported protonated amidine are negligible but the N11-C1-N1 angle is about 10 degrees wider in comparison with the same type of angles in coordinated amidinates.

## Reference

- 
- 1 W.-Z. Chen, G.-L. Xu, C.G. Jablonski and T. Ren, *J. Mol. Struct.*, 2008, **890**, 90-94.
